# Supplementary material
Source: PubMed Central journal article supplement (PMC8166074)
Supplement: pnas.2026577118.sapp.pdf [file pnas.2026577118.sapp.pdf]

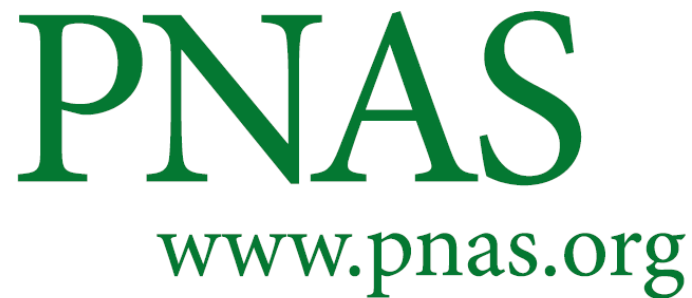

## **Supplementary Information for**

Carceral-Community Epidemiology, Structural Racism, and Covid-19 Disparities

Eric Reinhart

Lead Health and Justice Researcher, Data and Evidence for Justice Reform (DE JURE),  
The World Bank

PhD candidate, Harvard University Department of Anthropology

MD candidate, The University of Chicago Pritzker School of Medicine

Advanced candidate in adult psychoanalysis, The Chicago Center for Psychoanalysis

Daniel L. Chen, JD, PhD

Lead Principal Investigator, Data and Evidence for Justice Reform (DE JURE), The  
World Bank

Directeur de Recherche, Centre National de la Recherche Scientifique (CNRS)

Professor, Toulouse School of Economics

Professor, Institute for Advanced Study in Toulouse

Eric Reinhart

Email: [reinhar@fas.harvard.edu](mailto:reinhar@fas.harvard.edu)

### **This PDF file includes:**

Tables S1 to S5

**Table S1.** Estimates for relationship between the weekly case rate of Covid-19 and the detainees released in March per capita while controlling for poverty rate, percentage of Black and Hispanic population, rate of public transit usage, population density and cumulative case rate by week starting March 29 in the Chicago ZIP codes

| Week | March release rate | Poverty     | Public transit | % Blacks   | % Hispanics | Population Density | Cumulative case rate by week 13 |
|------|--------------------|-------------|----------------|------------|-------------|--------------------|---------------------------------|
| 11   | -0.00237           | -0.000187** | 0.000336***    | 0.0000152  | 0.0000498   | -1.05e-09          | 0.0114                          |
| 12   | -0.00823           | -0.0000513  | 0.000176       | 0.0000579  | -0.000126   | 6.22e-09*          | 0.224***                        |
| 13   | 0.0106             | 0.000238    | -0.000512*     | -0.0000731 | 0.0000758   | -5.18e-09*         | 0.765***                        |
| 14   | 0.0360             | 0.000825    | -0.0000458     | 0.00000172 | 0.000252    | -1.68e-08**        | 0.751***                        |
| 15   | 0.0303             | 0.00158     | 0.000704       | -0.00113   | 0.000498    | -2.43e-08          | 0.998***                        |
| 16   | 0.163*             | 0.00407***  | -0.000462      | -0.00119*  | 0.00130*    | 6.34e-09           | 0.405*                          |
| 17   | 0.299*             | 0.00139     | 0.000476       | 0.000415   | 0.00455***  | -5.92e-09          | 0.579*                          |
| 18   | 0.916***           | 0.00123     | 0.0000574      | -0.00102   | 0.00761***  | 8.03e-09           | 0.784***                        |
| 19   | 0.659***           | 0.000969    | -0.000640      | -0.000392  | 0.00584***  | 8.07e-10           | 0.509**                         |
| 20   | 0.624***           | 0.00123     | -0.000468      | -0.000674  | 0.00485***  | 8.07e-10           | 0.509**                         |
| 21   | 0.621***           | 0.000134    | 0.0000296      | -0.0000626 | 0.00466***  | 1.02e-10           | 0.451***                        |
| 22   | 0.374***           | 0.00114     | -0.000580      | -0.000176  | 0.00244***  | 1.37e-08           | 0.241*                          |
| 23   | 0.181***           | 0.00118*    | -0.000419      | -0.000468  | 0.000833*** | 4.51e-09           | 0.0621                          |
| 24   | 0.132***           | 0.000238    | 0.0000569      | -0.000284  | 0.00105***  | 2.32e-10           | 0.180**                         |
| 25   | -0.00222           | 0.0000806   | -0.000000526   | 0.0000262  | 0.000695*** | 2.39e-09           | 0.143**                         |
| 26   | 0.132***           | 0.00000741  | -0.000243      | -0.000214  | 0.000359*   | 2.42e-09           | 0.0569                          |
| 27   | 0.0188             | 0.000132    | 0.000128       | -0.000112  | 0.000295    | -5.63e-10          | 0.0523                          |
| 28   | -0.0536            | -0.000217   | -0.0000499     | 0.000306   | 0.000187    | 3.29e-10           | 0.0245                          |
| 29   | -0.0866            | -0.000289   | -0.000163      | 0.000463   | 0.000419    | -4.50e-09          | -0.0977                         |
| 30   | -0.0179            | 0.000172    | -0.00118       | 0.000228   | 0.0000790   | 6.83e-09           | -0.0965                         |
| 31   | 0.0661             | -0.000949*  | -0.000376      | 0.000297   | 0.00136***  | -1.96e-09          | 0.185*                          |
| 32   | 0.102*             | -0.000597   | -0.000574      | -0.000197  | 0.000865**  | -1.17e-08          | 0.149                           |

**Table S2.** Estimated relationship between cumulative Covid-19 case rates and the detainees released in March per capita while controlling for poverty rate, percentage of Black and Hispanic population, rate of public transit usage, population density and cumulative case rate by week starting March 29 in the Chicago ZIP codes

| <b>Week</b> | <b>March release rate</b> | <b>Poverty</b> | <b>Public transit</b> | <b>% Blacks</b> | <b>% Hispanics</b> | <b>Population Density</b> | <b>Cumulative case rate by week 13</b> |
|-------------|---------------------------|----------------|-----------------------|-----------------|--------------------|---------------------------|----------------------------------------|
| 11          | -0.00184                  | -0.000202**    | 0.000350***           | 0.0000235       | 0.0000556          | -1.06e-09                 | 0.0123                                 |
| 12          | -0.0121                   | -0.000259      | 0.000350              | 0.0000913       | -0.000115          | 7.80e-09**                | 0.244***                               |
| 13          | -0.0121                   | -0.000000598   | -0.000232*            | 0.0000329       | -0.000110*         | 3.20e-09**                | 0.984***                               |
| 14          | 0.0421                    | 0.00157**      | -0.000726             | -0.000266       | -0.000254          | -1.22e-08                 | 1.644***                               |
| 15          | 0.0724                    | 0.00315        | -0.000242             | -0.00245        | 0.00150            | -3.13e-08                 | 2.931***                               |
| 16          | 0.297                     | 0.00661**      | -0.000242             | -0.00245        | 0.00150            | -3.13e-08                 | 2.931***                               |
| 17          | 1.140***                  | 0.00664*       | 0.000181              | -0.00241        | 0.00630***         | -3.70e-08                 | 3.530***                               |
| 18          | 2.056***                  | 0.00787*       | 0.000239              | -0.00343        | 0.0139***          | -2.89e-08                 | 4.314***                               |
| 19          | 2.715***                  | 0.00884        | -0.000401             | -0.00383        | 0.0198***          | -2.13e-08                 | 4.828***                               |
| 20          | 3.312***                  | 0.00945        | -0.000979             | -0.00429        | 0.0243***          | -2.70e-08                 | 5.143***                               |
| 21          | 3.933***                  | 0.00959        | -0.00153              | -0.00499        | 0.0323***          | -8.41e-09                 | 6.076***                               |
| 22          | 4.307***                  | 0.0107         | -0.00153              | -0.00452        | 0.0314***          | -1.31e-08                 | 5.834***                               |
| 23          | 4.488***                  | 0.0119         | -0.00195              | -0.00499        | 0.0323***          | -8.64e-09                 | 5.896***                               |
| 24          | 4.620***                  | 0.0121         | -0.00189              | -0.00528        | 0.0333***          | -8.41e-09                 | 6.076***                               |
| 25          | 4.618***                  | 0.0122         | -0.00214              | -0.00546        | 0.0344***          | -3.60e-09                 | 6.276***                               |
| 26          | 4.751***                  | 0.0122         | -0.00214              | -0.00546        | 0.0344***          | -3.60e-09                 | 6.276***                               |
| 27          | 4.769***                  | 0.0124*        | -0.00201              | -0.00558        | 0.0347***          | -4.16e-09                 | 6.329***                               |
| 28          | 4.716***                  | 0.0121         | -0.00206              | -0.00527        | 0.0348***          | -3.83e-09                 | 6.353***                               |
| 29          | 4.629***                  | 0.0119         | -0.00222              | -0.00481        | 0.0353***          | -8.33e-09                 | 6.255***                               |
| 30          | 4.611***                  | 0.0120         | -0.00340              | -0.00458        | 0.0353***          | -1.50e-09                 | 6.159***                               |
| 31          | 4.678***                  | 0.0111         | -0.00378              | -0.00428        | 0.0367***          | -3.46e-09                 | 6.344***                               |
| 32          | 4.779***                  | 0.0105         | -0.00435              | -0.00448        | 0.0376***          | -1.51e-08                 | 6.493***                               |

**Table S3.** Estimated relationship between cumulative Covid-19 case rates as of August 8 and the variables selected by elastic regression: detainees released in March per capita and 17 of the principal components from a principal components analysis of 1,706 variables from the U.S. Census and American Community Survey 2018 5-Year Estimates (all those that have no missing values for Chicago ZIP codes)

| <b>Variable</b>                        | <b>Association with the<br/>cumulative case rate of<br/>Covid-19 as of August 8<br/>(beta coefficients)</b> |
|----------------------------------------|-------------------------------------------------------------------------------------------------------------|
| Detainees released in March per capita | 4.37961***                                                                                                  |
| Principal Components 20                | -0.00036**                                                                                                  |
| Principal Components 3                 | -0.00032***                                                                                                 |
| Principal Components 5                 | -0.00031***                                                                                                 |
| Principal Components 13                | -0.00031**                                                                                                  |
| Principal Components 2                 | 0.00028***                                                                                                  |
| Principal Components 15                | 0.00023*                                                                                                    |
| Principal Components 17                | -0.00022                                                                                                    |
| Principal Components 1                 | 0.00020***                                                                                                  |
| Principal Components 14                | 0.00018                                                                                                     |
| Principal Components 12                | 0.00017                                                                                                     |
| Principal Components 18                | -0.00015                                                                                                    |
| Principal Components 7                 | 0.00014                                                                                                     |
| Principal Components 4                 | 0.00012                                                                                                     |
| Principal Components 16                | -0.00011                                                                                                    |
| Principal Components 8                 | -0.00008                                                                                                    |
| Principal Components 6                 | 0.00007                                                                                                     |
| Principal Components 9                 | -0.00002                                                                                                    |

**Table S4.** Estimated relationship between cumulative Covid-19 case rates and the detainees released in March per capita while controlling for poverty rate, percentage of Black and Hispanic population, rate of public transit usage, population density and cumulative case rate by week starting March 29 in the Chicago zip codes as well as the detainees released from adjacent ZIP codes in March

| Week | March release rate | March release rate - donut | Poverty     | Public transit | % Blacks  | % Hispanics | Population Density | Cumulative case rate by week 13 |
|------|--------------------|----------------------------|-------------|----------------|-----------|-------------|--------------------|---------------------------------|
| 11   | -0.00202           | 0.00658                    | -0.000197** | 0.000350***    | 0.0000147 | 0.0000526   | -9.99e-10          | 0.0133                          |
| 12   | -0.0122            | 0.00308                    | -0.000257   | 0.000350       | 0.0000872 | -0.000116   | 7.82e-09**         | 0.245***                        |
| 13   | -0.0118            | -0.00871                   | -0.00000693 | -0.000232*     | 0.0000445 | -0.000106   | 3.13e-09*          | 0.983***                        |
| 14   | 0.0445             | -0.0898                    | 0.00150*    | -0.000724      | -0.000146 | -0.000213   | -1.30e-08          | 1.631***                        |
| 15   | 0.0730             | -0.0217                    | 0.00313     | -0.0000225     | -0.00137  | 0.000254    | -3.67e-08          | 2.639***                        |
| 16   | 0.304              | -0.225                     | 0.00645*    | -0.000236      | -0.00215  | 0.00161     | -3.33e-08          | 2.897***                        |
| 17   | 1.162***           | -0.776                     | 0.00607*    | 0.000199       | -0.00137  | 0.00665***  | -4.36e-08          | 3.414***                        |
| 18   | 2.083***           | -0.984                     | 0.00715     | 0.000262       | -0.00212  | 0.0144***   | -3.74e-08          | 4.167***                        |
| 19   | 2.749***           | -1.236                     | 0.00794     | -0.000372      | -0.00218  | 0.0203***   | -3.19e-08          | 4.644***                        |
| 20   | 3.321***           | -0.341                     | 0.00920     | -0.000971      | -0.00383  | 0.0245***   | -2.99e-08          | 5.092***                        |
| 21   | 3.941***           | -0.280                     | 0.00938     | -0.000943      | -0.00398  | 0.0291***   | -2.93e-08          | 5.551***                        |
| 22   | 4.318***           | -0.382                     | 0.0104      | -0.00152       | -0.00401  | 0.0316***   | -1.64e-08          | 5.777***                        |
| 23   | 4.503***           | -0.541                     | 0.0115      | -0.00194       | -0.00427  | 0.0325***   | -1.33e-08          | 5.815***                        |
| 24   | 4.640***           | -0.713                     | 0.0116      | -0.00188       | -0.00433  | 0.0336***   | -1.45e-08          | 5.970***                        |
| 25   | 4.640***           | -0.807                     | 0.0116      | -0.00187       | -0.00417  | 0.0344***   | -1.29e-08          | 6.099***                        |
| 26   | 4.777***           | -0.955                     | 0.0115      | -0.00211       | -0.00419  | 0.0348***   | -1.18e-08          | 6.133***                        |
| 27   | 4.798***           | -1.037                     | 0.0116      | -0.00198       | -0.00419  | 0.0351***   | -1.31e-08          | 6.173***                        |
| 28   | 4.747***           | -1.131                     | 0.0113      | -0.00203       | -0.00376  | 0.0353***   | -1.35e-08          | 6.184***                        |
| 29   | 4.648***           | -0.687                     | 0.0114      | -0.00220       | -0.00389  | 0.0356***   | -1.42e-08          | 6.153***                        |
| 30   | 4.628***           | -0.594                     | 0.0116      | -0.00339       | -0.00379  | 0.0356***   | -6.60e-09          | 6.070***                        |
| 31   | 4.700***           | -0.820                     | 0.0105      | -0.00376       | -0.00319  | 0.0371***   | -1.05e-08          | 6.221***                        |
| 32   | 4.803***           | -0.879                     | 0.00984     | -0.00433       | -0.00331  | 0.0380***   | -2.27e-08          | 6.361***                        |

**Table S5.** Estimated relationship between cumulative Covid-19 case rates and the detainees released in March per capita while controlling for poverty rate, percentage of Black and Hispanic population, rate of public transit usage, population density and cumulative case rate by week starting March 29 in the Chicago ZIP codes as well as the rate of cumulative tests performed for detecting Covid-19

| Week | March release rate | Cumulative tests rate | Poverty rate | Public transit | % Blacks  | % Hispanics | Population Density | Cumulative case rate by week 13 |
|------|--------------------|-----------------------|--------------|----------------|-----------|-------------|--------------------|---------------------------------|
| 11   | -0.00241           | 0.0763*               | -0.000212**  | 0.000330***    | 0.0000403 | 0.0000790*  | -1.41e-09          | 0.00857                         |
| 12   | -0.0124            | 0.0473*               | -0.000368    | 0.000335       | 0.000136  | 0.0000146   | 6.36e-09*          | 0.235***                        |
| 13   | -0.0106            | -0.00191              | 0.00000549   | -0.000238*     | 0.0000235 | -0.000122   | 3.17e-09**         | 0.988***                        |
| 14   | -0.0260            | 0.0689*               | 0.00135*     | -0.000412      | 0.000172  | 0.000283    | -5.76e-09          | 1.433***                        |
| 15   | -0.112             | 0.172***              | 0.00177      | 0.00108        | 0.000533  | 0.00208*    | -5.34e-09          | 1.812***                        |
| 16   | -0.0262            | 0.217***              | 0.00390      | 0.00167        | 0.000704  | 0.00780***  | 2.63e-08           | 2.067***                        |
| 17   | 0.596**            | 0.203***              | 0.00430      | 0.00221        | 0.000441  | 0.00780***  | 2.63e-08           | 2.067***                        |
| 18   | 1.108***           | 0.196***              | 0.00539      | 0.00252        | -0.000227 | 0.0133***   | 3.68e-08           | 2.503***                        |
| 19   | 1.450***           | 0.183***              | 0.00617      | 0.00239        | -0.000686 | 0.0175***   | 3.61e-08           | 2.931***                        |
| 20   | 2.075***           | 0.136***              | 0.00603      | 0.00188        | -0.00118  | 0.0221***   | 1.25e-08           | 3.580***                        |
| 21   | 2.846***           | 0.101**               | 0.00728      | 0.00131        | -0.00232  | 0.0268***   | 5.38e-09           | 4.341***                        |
| 22   | 3.307***           | 0.0742**              | 0.00839      | 0.000733       | -0.00268  | 0.0300***   | 7.80e-09           | 4.960***                        |
| 23   | 3.522***           | 0.0658**              | 0.00932      | 0.000249       | -0.00298  | 0.0313***   | 8.05e-09           | 5.186***                        |
| 24   | 3.798***           | 0.0542*               | 0.00963      | -0.000528      | -0.00328  | 0.0327***   | 5.85e-09           | 5.469***                        |
| 25   | 3.844***           | 0.0469*               | 0.00971      | -0.000848      | -0.00314  | 0.0339***   | 5.91e-09           | 5.713***                        |
| 26   | 4.003***           | 0.0407*               | 0.00984      | -0.00136       | -0.00330  | 0.0345***   | 3.89e-09           | 5.841***                        |
| 27   | 4.039***           | 0.0381*               | 0.00984      | -0.00143       | -0.00320  | 0.0352***   | 1.13e-09           | 5.974***                        |
| 28   | 3.976***           | 0.0343*               | 0.0100       | -0.00183       | -0.00286  | 0.0356***   | -4.33e-10          | 6.056***                        |
| 29   | 3.967***           | 0.0301*               | 0.0100       | -0.00240       | -0.00250  | 0.0361***   | -6.31e-09          | 6.019***                        |
| 30   | 3.850***           | 0.0325*               | 0.0101       | -0.00372       | -0.00189  | 0.0364***   | -2.09e-09          | 5.924***                        |
| 31   | 3.964***           | 0.0285*               | 0.00963      | -0.00422       | -0.00178  | 0.0377***   | -4.50e-09          | 6.140***                        |
| 32   | 3.984***           | 0.0296*               | 0.00935      | -0.00515       | -0.001729 | 0.0386***   | -1.58e-08          | 6.251***                        |
